# Supplementary material for: Circulating primitive erythroblasts establish a functional, protein 4.1R-dependent cytoskeletal network prior to enucleating
Source: PubMed Central journal article supplement (PMC5507979; doi:10.1038/s41598-017-05498-4), 2017-07-12
Supplement: 41598_2017_5498_MOESM1_ESM.pdf [file 41598_2017_5498_MOESM1_ESM.pdf]

## Supplementary Information

### **Circulating primitive erythroblasts establish a functional, protein 4.1R-dependent cytoskeletal network prior to enucleating**

#### **Authors**

Yu-Shan Huang<sup>1</sup>, Luis F. Delgadillo<sup>2</sup>, Kathryn H. Cyr<sup>3</sup>, Paul D. Kingsley<sup>4</sup>, Xiuli An<sup>5</sup>, Kathleen E. McGrath<sup>4</sup>, Narla Mohandas<sup>5</sup>, John G. Conboy<sup>6</sup>, Richard E. Waugh<sup>2</sup>, Jiandi Wan<sup>3,7</sup>, and James Palis<sup>1,4,\*</sup>

<sup>1</sup>Department of Biomedical Genetics, <sup>2</sup>Department of Biomedical Engineering, <sup>4</sup>Department of Pediatrics and Center for Pediatric Biomedical Research, University of Rochester, Rochester, NY 14642; <sup>3</sup>Department of Biomedical Engineering, <sup>7</sup>Microsystems Engineering, Rochester Institute of Technology, Rochester, NY 14623; <sup>5</sup>Red Cell Physiology Laboratory, New York Blood Center, New York, NY 10065; and <sup>6</sup>Life Sciences Division, Lawrence Berkeley National Laboratory, Berkeley, CA 94720

**Supplementary Table 1. Primer pairs for qPCR analysis.**

| <b>Genes</b>   | <b>Forward</b>                              | <b>Reverse</b>                             | <b>Reference</b>                                  |
|----------------|---------------------------------------------|--------------------------------------------|---------------------------------------------------|
| <i>Spta1</i>   | 5'-CCA AGC TCT GGC AGA AGG CAA<br>GGC-3'    | 5'-CCC ATT ACT TGC TGC CAC ACT<br>ATG-3'   | Modified from Nilson et al.,<br>2006 <sup>1</sup> |
| <i>Sptb</i>    | 5'-GCT TAA GGA ACG CCA GAC TCC AG-<br>3'    | 5'-CAC ACC CTG TCC TCG TCC TGG CC-<br>3'   | Modified from Nilson et al.,<br>2006 <sup>1</sup> |
| <i>Slc4a1</i>  | 5'-CAC AGT GCC TCT CCG TCG TCT CAT<br>C-3'  | 5'-CCT TCC CCA CCC ACA GCC ATA ACA<br>C-3' | <sup>1</sup>                                      |
| <i>Ank1</i>    | 5'-CCG TTG TGA TCC GAT CTG AAG-3'           | 5'-CAC AGG GCT AAT GTT GTC TGA G-3'        | <sup>2</sup>                                      |
| <i>Epb42</i>   | 5'-TTC CAC GCA GCA GAA AAC AAC-3'           | 5'- GCA CGG AAG TTC AGG GTG ATA G-<br>3'   | PrimerBank <sup>3</sup> ID: 7305035a1             |
| <i>Gypa</i>    | 5'-GCC GAA TGA CAA AGA AAA GTT CA-<br>3'    | 5'-TCA ATA GAA CTC AAA GGC ACA CTG<br>T-3' | <sup>4</sup>                                      |
| <i>Epb41</i>   | 5'-GCT CAG GAA GAA CAC AGA GAG G-<br>3'     | 5'-CAT TCG TAG ACC GTG TCA TCC-3'          | <sup>5</sup>                                      |
| <i>Add1</i>    | 5'-TGA AGA AGA CCT TCC CCA GGA<br>GCC-3'    | 5'-GGG CGT CGG CTT GAA GGT GG-3'           | Designed using Primer-<br>BLAST <sup>6</sup>      |
| <i>Add2</i>    | 5'-TGA CAC CCA TCA ACG ACC TC-3'            | 5'-CTG ATC TTG CAC CGC ATA AGC-3'          | PrimerBank ID:<br>146134376c1                     |
| <i>Gypc</i>    | 5'-TGT GCC ACC ATT ATC AGC ACC-3'           | 5'-GAC TCC TCC CAT CTG TAT CGG-3'          | PrimerBank <sup>3</sup> ID:<br>21313681a1         |
| <i>Tmod1</i>   | 5'-CGA AGG AAT TTA AGG ACC GAG AA-<br>3'    | 5'-CCC AGG ATA GCT GCG ATG TC-3'           | PrimerBank <sup>3</sup> ID:<br>144922650c2        |
| <i>Tpm1</i>    | 5'-TTG AAA GCC GAG CCC AAA AAG-3'           | 5'-TCAT ACT TCC GGT CAG CAT CTT-3'         | PrimerBank <sup>3</sup> ID:<br>256000787c1        |
| <i>Dmtn</i>    | 5'-GCA GAA GCA ACC TCT TAC CTC-3'           | 5'-AGA TCC TTG TAG CCC AAC ACC-3'          | PrimerBank <sup>3</sup> ID: 7305037a1             |
| <i>Rn18s</i>   | 5'-TTG ACG GAA GGG CAC CAC CAG-3'           | 5'-GCA CCA CCA CCC ACG GAA TCG-3'          | RTPPrimerDB <sup>7</sup> ID: 1014                 |
| <i>Hbb-y</i>   | 5'-CTC TAG CTG TCC AGC AAT CCT G-3'         | 5'-GCT TTC AAG GAA CAG TCC AGT ATT<br>C-3' | <sup>8</sup>                                      |
| <i>Hbb-bh1</i> | 5'-AGT TTG GAA ACC TCT CTT CTG CCC<br>TG-3' | 5'-TGT TCT TAA CCC CCA AGC CCA AG-<br>3'   | <sup>8</sup>                                      |
| <i>Hbb-b1</i>  | 5'-GCT CTT GCC TGT GAA CAA TG -3'           | 5'-GTC AGA AGA CAG ATT TTC AAA TG-<br>3'   | <sup>8</sup>                                      |

**Supplementary Table 2. Primer pairs for PCR analysis of Epb41 exon usage.**

| <b>Exon</b> | <b>Forward</b>                   | <b>Reverse</b>                   | <b>Product Size</b> |
|-------------|----------------------------------|----------------------------------|---------------------|
| 1a          | 5'-CAG GTC CCT GTC CTG TGC-3'    |                                  | 363                 |
| 1c          | 5'-ATT GTT CGT CGG GCT GAA GC-3' |                                  | 411                 |
| 2           |                                  | 5'-CCC CCT TCA CCT TTC TCT TT-3' |                     |
| 2           | 5'-AAG GTG AAG GGG GTC AGA AG-3' |                                  | 655                 |
| 8           |                                  | 5'-AGG GCT AAA GTT GCA AAG GA-3' |                     |
| 7           | 5'-CCG ACC CAG CAC AAT TAA CA-3' |                                  | 903                 |
| 13          |                                  | 5'-CCC GCT TCT CTT CAA CCT TC-3' |                     |
| 17          | 5'-GAA TCG GTA CCC GAA CCA C-3'  |                                  | 409                 |
| 20          |                                  | 5'-GGT CGA TAT CGG CAT CTC CT-3' |                     |
| 19          | 5'-AGA CCC TGG AGT CTT GCT GA-3' |                                  | 385                 |
| 22          |                                  | 5'-TTG GTT TTC TGT GGT GTG GA-3' |                     |

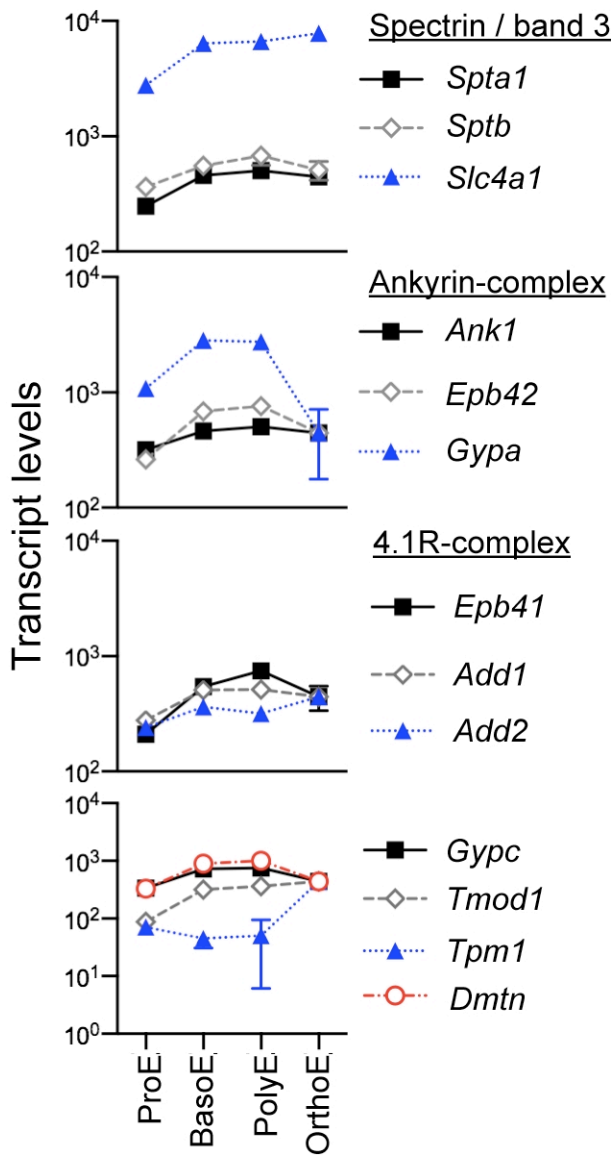

**Supplementary Figure S1. Expression of genes associated with the cytoskeleton in bone marrow-derived erythroblasts at progressive stages of maturation.** Comparison of transcript levels of cytoskeletal genes in definitive erythroblasts isolated from adult mouse bone marrow. Data derived from An, et al. 2014<sup>10</sup>. ProE, proerythroblasts; BasoE, basophilic erythroblasts; PolyE, polychromatophilic erythroblasts; and OrthoE, orthochromatic erythroblasts.



## **Supplementary Methods:**

### **RT-PCR analysis of *Epb41* exon usage.**

Primitive erythroid cells were sorted from E9.5 (yolk sac and blood), E10.5 (blood) and E12.5 (blood) as previously described<sup>9</sup>. RNA was isolated using Qiagen RNeasy plus mini kit with gDNA eliminator. RNA was reverse transcribed with High Capacity Reverse Transcription kit with RNase Inhibitor (Applied Biosystems/ThermoFisher). PCR was performed on a BioRad C1000 thermocycler using Quanta Bio Accustart II PCR Supermix. All annealing was performed at 58°C, with the exception of Exon 1C-2 was performed at 64°C. Extensions were at 70°C for 30", denaturing at 93°C for 20" (after an initial activation at 95°C for 2 min).

## Supplementary References

1. Nilson, D.G., Sabatino, D.E., Bodine, D.M., Gallagher, P.G. Major erythrocyte membrane protein genes in EKLF-deficient mice. *Exp. Hematol.* **34**, 705–712 (2006).
2. Huang, H., et al. A deep intronic mutation in the ankyrin-1 gene causes diminished protein expression resulting in hemolytic anemia in mice. *G3 Bethesda MD.* **3**, 1687–1695 (2013).
3. Wang, X. & Seed, B. A PCR primer bank for quantitative gene expression analysis. *Nucleic Acids Res.* **31**, e154 (2003).
4. Basu, P., et al. KLF2 is essential for primitive erythropoiesis and regulates the human and murine embryonic beta-like globin genes in vivo. *Blood* **106**, 2566–2571 (2005).
5. Shi, Z.T., et al. Protein 4.1R-deficient mice are viable but have erythroid membrane skeleton abnormalities. *J. Clin. Invest.* **103**, 331–340 (1999).
6. Ye, J., et al. Primer-BLAST: a tool to design target-specific primers for polymerase chain reaction. *BMC Bioinformatics* **13**, 134 (2012).
7. Pattyn, F., Speleman, F., De Paepe, A. & Vandesompele, J. RTPrimerDB: the Real-Time PCR primer and probe database. *Nucleic Acids Res.* **31**, 122–123 (2003).
8. Kingsley, P.D., et al. “Maturation” globin switching in primary primitive erythroid cells. *Blood* **107**, 1665–1672 (2006).
9. Kingsley, P.D., et al. Ontogeny of erythroid gene expression. *Blood* **121**, e5–e13 (2013).
10. An, X., et al. Global transcriptome analyses of human and murine terminal erythroid differentiation. *Blood* **123**, 3466–3477 (2014).
